# Supplementary material for: Characterization and Comparative Genomics Analysis of a New Bacteriophage BUCT610 against Klebsiella pneumoniae and Efficacy Assessment in Galleria mellonella Larvae
Source: MDPI journal article supplement (doi:10.3390/ijms23148040), 2022-07-21
Supplement: s1 [file s1]

**Table S1. The results of lifestyle identification of phage BUCT610.**

| Sample Name | Target Name      | Reporter | CT           | Sample Name | Target Name                    | Reporter | CT           | Sample Name | Target Name | Reporter | CT           |
|-------------|------------------|----------|--------------|-------------|--------------------------------|----------|--------------|-------------|-------------|----------|--------------|
| BUCT610     | terminase sunbit | SYBR     | 11.235       | BUCT610     | conserved hypothetical protein | SYBR     | 9.485        | BUCT610     | recombinase | SYBR     | 7.447        |
| BUCT610     | terminase sunbit | SYBR     | 11.144       | BUCT610     | conserved hypothetical protein | SYBR     | 9.418        | BUCT610     | recombinase | SYBR     | 7.365        |
| BUCT610     | terminase sunbit | SYBR     | 11.174       | BUCT610     | conserved hypothetical protein | SYBR     | 9.513        | BUCT610     | recombinase | SYBR     | 7.445        |
| K1119       | terminase sunbit | SYBR     | 37.187       | K1119       | conserved hypothetical protein | SYBR     | 37.376       | K1119       | recombinase | SYBR     | 38.048       |
| K1119       | terminase sunbit | SYBR     | 37.081       | K1119       | conserved hypothetical protein | SYBR     | 37.525       | K1119       | recombinase | SYBR     | Undetermined |
| K1119       | terminase sunbit | SYBR     | 37.281       | K1119       | conserved hypothetical protein | SYBR     | 37.505       | K1119       | recombinase | SYBR     | Undetermined |
| R-K1119-RA4 | terminase sunbit | SYBR     | Undetermined | R-K1119-RA4 | conserved hypothetical protein | SYBR     | 35.406       | R-K1119-RA4 | recombinase | SYBR     | 35.262       |
| R-K1119-RA4 | terminase sunbit | SYBR     | Undetermined | R-K1119-RA4 | conserved hypothetical protein | SYBR     | 35.424       | R-K1119-RA4 | recombinase | SYBR     | 36.565       |
| R-K1119-RA4 | terminase sunbit | SYBR     | Undetermined | R-K1119-RA4 | conserved hypothetical protein | SYBR     | 35.624       | R-K1119-RA4 | recombinase | SYBR     | 36.505       |
| R-K1119-RA9 | terminase sunbit | SYBR     | Undetermined | R-K1119-RA9 | conserved hypothetical protein | SYBR     | 37.518       | R-K1119-RA9 | recombinase | SYBR     | 34.459       |
| R-K1119-RA9 | terminase sunbit | SYBR     | 39.906       | R-K1119-RA9 | conserved hypothetical protein | SYBR     | 37.696       | R-K1119-RA9 | recombinase | SYBR     | 34.395       |
| R-K1119-RA9 | terminase sunbit | SYBR     | 39.606       | R-K1119-RA9 | conserved hypothetical protein | SYBR     | 37.780       | R-K1119-RA9 | recombinase | SYBR     | 34.383       |
| R-K1119-RB5 | terminase sunbit | SYBR     | Undetermined | R-K1119-RB5 | conserved hypothetical protein | SYBR     | Undetermined | R-K1119-RB5 | recombinase | SYBR     | Undetermined |
| R-K1119-RB5 | terminase sunbit | SYBR     | Undetermined | R-K1119-RB5 | conserved hypothetical protein | SYBR     | 37.454       | R-K1119-RB5 | recombinase | SYBR     | 36.155       |
| R-K1119-RB5 | terminase sunbit | SYBR     | Undetermined | R-K1119-RB5 | conserved hypothetical protein | SYBR     | 37.435       | R-K1119-RB5 | recombinase | SYBR     | 36.055       |
| R-K1119-RB7 | terminase sunbit | SYBR     | Undetermined | R-K1119-RB7 | conserved hypothetical protein | SYBR     | 35.711       | R-K1119-RB7 | recombinase | SYBR     | 35.515       |
| R-K1119-RB7 | terminase sunbit | SYBR     | Undetermined | R-K1119-RB7 | conserved hypothetical protein | SYBR     | 35.665       | R-K1119-RB7 | recombinase | SYBR     | 35.521       |
| R-K1119-RB7 | terminase sunbit | SYBR     | Undetermined | R-K1119-RB7 | conserved hypothetical protein | SYBR     | 35.727       | R-K1119-RB7 | recombinase | SYBR     | 35.519       |

The results of qPCR to determine the lifestyle of phage BUCT610. The experiment was repeated three times for each sample. (samples: R-K1119-RA4; R-K1119-RA9; R-K1119-RB5; R-K1119-RB7; Negative group: K1119; Positive group: BUCT610).
